# Supplementary material
Source: PubMed Central journal article supplement (PMC2776409)
Supplement: 0904357106_Appendix_PDF.pdf [file 0904357106_Appendix_PDF.pdf]

# S Supporting Information

## 2 S.1 Stability condition for behavioral equilibrium

In order for a candidate behavioral equilibrium,  $a_1^*$  and  $a_2^*$ , that solves the equations in (5) to  
4 represent a local maximum for each individual's objective function and to be locally stable under  
the behavioral dynamics given in (4), the candidate equilibrium must satisfy two conditions. The  
6 first guarantees that  $a_1^*$  and  $a_2^*$  represent local maxima and is given by two equations:

$$\begin{aligned} \frac{\partial^2 x_1}{\partial a_1^2} \Big|_{\substack{a_1=a_1^* \\ a_2=a_2^*}} < 0 \\ \frac{\partial^2 x_2}{\partial a_2^2} \Big|_{\substack{a_1=a_1^* \\ a_2=a_2^*}} < 0. \end{aligned} \tag{S1}$$

The second condition is found by analyzing the conditions for the local stability of a rest point  
8 for the gradient dynamics given in (4). The local stability of this rest point is determined by the  
eigenvalues,  $\lambda_1$  and  $\lambda_2$  of the Jacobian matrix defined by

$$J = \begin{pmatrix} \frac{\partial^2 x_1}{\partial a_1^2} & \frac{\partial^2 x_1}{\partial a_1 \partial a_2} \\ \frac{\partial^2 x_2}{\partial a_1 \partial a_2} & \frac{\partial^2 x_2}{\partial a_2^2} \end{pmatrix} \tag{S2}$$

when  $J$  is evaluated at  $a_1^*$  and  $a_2^*$ . A sufficient condition for the stability of this rest point is that  
the real parts of both  $\lambda_1$  and  $\lambda_2$  are less than zero [1]; this condition holds when

$$\text{Tr}(J) = \frac{\partial^2 x_1}{\partial a_1^2} + \frac{\partial^2 x_2}{\partial a_2^2} < 0$$

10 and

$$|J| = \frac{\partial^2 x_1}{\partial a_1^2} \frac{\partial^2 x_2}{\partial a_2^2} - \frac{\partial^2 x_1}{\partial a_1 \partial a_2} \frac{\partial^2 x_2}{\partial a_1 \partial a_2} > 0, \tag{S3}$$

where  $\text{Tr}(J)$  and  $|J|$  are evaluated at  $a_1^*$  and  $a_2^*$ . The equations in condition (S1) guarantee that  
12  $\text{Tr}(J) < 0$ , so our second condition is equation (S3).

Moreover, we can specify more stringent conditions that guarantee the uniqueness and global  
14 stability of the behavioral equilibrium defined by (5). Let  $\mathcal{A}$  be the set of allowable actions, i.e.  
 $(a_1, a_2) \in \mathcal{A} \times \mathcal{A}$  where  $\times$  denotes the Cartesian product. Suppose that  $\mathcal{A}$  is convex. Then if the

local stability conditions (S1) and (S3) hold not only at the equilibrium point but also hold for  
 2 all  $(a_1, a_2) \in \mathcal{A} \times \mathcal{A}$ , the behavioral equilibrium defined by (5) is unique and globally stable under  
 the dynamic given in (4). A proof of this result would follow Rosen [2] noting that Rosen's result  
 4 guarantees that the equilibrium is unique and globally stable when  $J + J^\top$  is negative definite,  
 where  $^\top$  denotes matrix transpose;  $J$  is stable (i.e. all eigenvalues of  $J$  have negative real parts) if  
 6 and only if  $J + J^\top$  is negative definite [3, p. 160]

## S.2 Derivation of the first and second order ESS conditions

8 First, we establish that one can express the behavioral equilibrium actions  $a_1^*$  and  $a_2^*$  as functions  
 of  $\beta_1$  and  $\beta_2$ . Remember that the behavioral equilibrium is given by the equations in (5), which say  
 10 that the derivative of both individuals' objective functions with respect to their own actions vanish  
 at the behavioral equilibrium. Note also that the objective function of an individual is a function of  
 12 the payoffs, and consequently, of actions, but also depend on the genetically determined trait  $\beta$  of  
 each individual. Thus, we can take the functions  $x_1(a_1, a_2)$  and  $x_2(a_1, a_2)$  as instances of a family  
 14 of functions parametrized by  $\beta$ ,  $X(a_1, a_2, \beta)$ . Moreover, since both the payoff and the objective  
 functions are symmetric with respect to the two individuals, we can write,  $x_1(a_1, a_2) = X(a_1, a_2, \beta_1)$   
 16 and  $x_2(a_1, a_2) = X(a_2, a_1, \beta_2)$ . In this way, we can express the behavioral equilibrium conditions  
 as:

$$\left. \frac{\partial x_1}{\partial a_1} \right|_{\substack{a_1=a_1^* \\ a_2=a_2^*}} = \left. \frac{\partial X(a_1, a_2, \beta_1)}{\partial a_1} \right|_{\substack{a_1=a_1^* \\ a_2=a_2^*}} = 0 \quad (\text{S4})$$

$$\left. \frac{\partial x_2}{\partial a_2} \right|_{\substack{a_1=a_1^* \\ a_2=a_2^*}} = \left. \frac{\partial X(a_2, a_1, \beta_2)}{\partial a_2} \right|_{\substack{a_1=a_1^* \\ a_2=a_2^*}} = 0. \quad (\text{S5})$$

18 Thus, we have two equations with four variables ( $a_1^*$ ,  $a_2^*$ ,  $\beta_1$  and  $\beta_2$ ) and we can use the implicit  
 function theorem to express two of them as functions of the other two. Specifically, the implicit  
 20 function theorem says that, for  $J$  in (S2), as long as  $|J| \neq 0$ , we can solve for  $a_1^*$  and  $a_2^*$  in terms  
 of  $\beta_1$  and  $\beta_2$ . Furthermore, the first derivatives of  $a_1^*$  and  $a_2^*$  with respect to  $\beta_1$  and  $\beta_2$  exist. Now,

we take the total derivatives of equations (5) with respect to  $\beta_1$  at the behavioral equilibrium:

$$\begin{aligned}\frac{d}{d\beta_1} \left[ \frac{\partial x_1}{\partial a_1} \right] &= \frac{\partial^2 x_1}{\partial a_1^2} \frac{\partial a_1^*}{\partial \beta_1} + \frac{\partial^2 x_1}{\partial a_1 \partial a_2} \frac{\partial a_2^*}{\partial \beta_1} + \frac{\partial^2 x_1}{\partial \beta_1 \partial a_1} = 0 \\ \frac{d}{d\beta_1} \left[ \frac{\partial x_2}{\partial a_2} \right] &= \frac{\partial^2 x_2}{\partial a_1 \partial a_2} \frac{\partial a_1^*}{\partial \beta_1} + \frac{\partial^2 x_2}{\partial a_2^2} \frac{\partial a_2^*}{\partial \beta_1} + \frac{\partial^2 x_2}{\partial \beta_1 \partial a_2} = 0,\end{aligned}$$

2 In these equations, all partial derivatives of  $x_1$  and  $x_2$  are evaluated at the behavioral equilibrium  $(a_1^*, a_2^*)$ .

4 From these equations, one can solve for  $\partial a_1^*/\partial \beta_1$  and  $\partial a_2^*/\partial \beta_1$  to obtain

$$\frac{\partial a_1^*}{\partial \beta_1} = - \left[ \frac{1}{|J|} \frac{\partial^2 x_2}{\partial a_2^2} \frac{\partial^2 x_1}{\partial \beta_1 \partial a_1} \right]_{\substack{a_1=a_1^* \\ a_2=a_2^*}} \quad (\text{S6})$$

$$\frac{\partial a_2^*}{\partial \beta_1} = \left[ \frac{1}{|J|} \frac{\partial^2 x_2}{\partial a_1 \partial a_2} \frac{\partial^2 x_1}{\partial \beta_1 \partial a_1} \right]_{\substack{a_1=a_1^* \\ a_2=a_2^*}}, \quad (\text{S7})$$

which uses the fact that  $\frac{\partial^2 x_2}{\partial \beta_1 \partial a_2} = 0$ . These derivatives give us the necessary ingredients to write  
6 down the change in an individual's fitness when that individual's  $\beta$  is increased or decreased. As  
explained in the text, in order for  $\beta^*$  to be an ESS, it must be the case that no mutant individual  
8 with a value of  $\beta \neq \beta^*$  can obtain a higher fitness than a resident individual with the evolutionarily  
stable value  $\beta^*$  when the population is nearly fixed for  $\beta^*$ . To write the ESS condition, we adopt  
10 the convention that individual 1 is always the mutant individual, and individual 2 is the resident,  
i.e.  $\beta_1 = \beta_m$  and  $\beta_2 = \beta_r$ . Substituting the derivatives (S6) and (S7), we can write for the ESS  
12 condition (equation 7):

$$\frac{dw_m}{d\beta_m} = \frac{\partial u_1}{\partial a_1} \frac{-1}{|J|} \frac{\partial^2 x_2}{\partial a_2^2} \frac{\partial^2 x_1}{\partial \beta_1 \partial a_1} + \frac{\partial u_1}{\partial a_2} \frac{1}{|J|} \frac{\partial^2 x_2}{\partial a_1 \partial a_2} \frac{\partial^2 x_1}{\partial \beta_1 \partial a_1} = 0.$$

Rearranging, we get:

$$\frac{dw_m}{d\beta_m} = \frac{1}{|J|} \frac{\partial^2 x_1}{\partial \beta_1 \partial a_1} \left( \frac{\partial u_1}{\partial a_2} \frac{\partial^2 x_2}{\partial a_1 \partial a_2} - \frac{\partial u_1}{\partial a_1} \frac{\partial^2 x_2}{\partial a_2^2} \right) = 0. \quad (\text{S8})$$

14 Again, all partial derivatives with respect to  $a_1$  and  $a_2$  are evaluated at the behavioral equilibrium.

For this equation to hold, the term in the parentheses has to be zero since  $\frac{\partial^2 x_1}{\partial \beta_1 \partial a_1} \neq 0$ , so we have  
16 the condition in equation (8).

The second order condition for the candidate ESS is that the  $w_m$  is a fitness maximum, and not a minimum, at  $\beta_m = \beta_r = \beta^*$ . Using the implicit function theorem again and the first order condition (8), this second order condition can be shown to be (after considerably more algebra):

$$\frac{d^2 w_m}{d\beta_m^2} = \left( \frac{\frac{\partial^2 x_1}{\partial \beta_1 \partial a_1}}{|J|} \right)^2 \left[ \frac{\partial^2 x_2}{\partial a_2^2}, -\frac{\partial^2 x_2}{\partial a_1 \partial a_2} \right] \cdot \left[ H(u_1) + \frac{\left( \frac{\partial u_1}{\partial a_1} \frac{\partial^2 x_1}{\partial a_2 \partial a_1} - \frac{\partial u_1}{\partial a_2} \frac{\partial^2 x_1}{\partial a_1^2} \right)}{|J|} H\left(\frac{\partial x_2}{\partial a_2}\right) \right] \cdot \left[ \frac{\partial^2 x_2}{\partial a_2^2}, -\frac{\partial^2 x_2}{\partial a_1 \partial a_2} \right]^\top < 0, \quad (\text{S9})$$

where  $H(\cdot)$  is a Hessian matrix with respect to  $a_1$  and  $a_2$  of the function that is its argument. Likewise, the convergence stability condition is [4–6]

$$\frac{d^2 w_m}{d\beta_m^2} + \frac{d^2 w_m}{d\beta_m d\beta_r} < 0, \quad (\text{S10})$$

where the first term on the right hand side is given by equation (S9) and the second term is given by

$$\begin{aligned} \frac{d^2 w_m}{d\beta_m d\beta_r} &= \frac{\frac{\partial^2 x_1}{\partial \beta_1 \partial a_1} \frac{\partial^2 x_2}{\partial \beta_2 \partial a_2}}{|J|^2} \\ &\left[ \frac{\partial^2 x_2}{\partial a_2^2}, -\frac{\partial^2 x_2}{\partial a_1 \partial a_2} \right] \cdot \left[ H(u_1) + \frac{\left( \frac{\partial u_1}{\partial a_1} \frac{\partial^2 x_1}{\partial a_2 \partial a_1} - \frac{\partial u_1}{\partial a_2} \frac{\partial^2 x_1}{\partial a_1^2} \right)}{|J|} H\left(\frac{\partial x_2}{\partial a_2}\right) \right] \cdot \left[ -\frac{\partial^2 x_1}{\partial a_2 \partial a_1}, \frac{\partial^2 x_1}{\partial a_1^2} \right]^\top \\ &+ \frac{\frac{\partial^2 x_1}{\partial \beta_1 \partial a_1} \left( \frac{\partial u_1}{\partial a_1} \frac{\partial^2 x_1}{\partial a_2 \partial a_1} - \frac{\partial u_1}{\partial a_2} \frac{\partial^2 x_1}{\partial a_1^2} \right)}{|J|^2} \left[ \frac{\partial^2 x_2}{\partial a_2^2}, -\frac{\partial^2 x_2}{\partial a_1 \partial a_2} \right] \cdot \left[ \frac{\partial^3 x_2}{\partial \beta_2 \partial a_2^2}, \frac{\partial^2 x_2}{\partial \beta_2 \partial a_1 \partial a_2} \right]^\top \end{aligned} \quad (\text{S11})$$

### 8 S.3 Complementarity and mutual regard

In this section, we find sufficient conditions for  $\beta > 0$  to be evolutionarily stable when individuals have generic other-regarding objectives and the payoff functions characterize a social interaction similar in spirit to a prisoner’s dilemma. Let  $x_2$  be the objective of individual 2. We assume that individual 2 is both “other-regarding” and “self-regarding”, so  $x_2 = G(u_1, u_2)$ , for some function  $G$ , is increasing in both  $u_1$  and  $u_2$  and that  $x_2$  is bounded and concave with respect to the payoffs  $u_1$  and  $u_2$ ; i.e., all pure second derivatives of  $x_2$  with respect to  $u_1$  and  $u_2$  are negative. These conditions are given in the first row of (S12). Payoffs  $u_1$  and  $u_2$  are decreasing functions of the

action of the focal individual and increasing functions of the partner's action. We also assume that the actions of individual 2 incur accelerating costs to individual 2 itself and yield benefits with diminishing returns to individual 1. The conditions on payoffs are given in the second and third rows of (S12).

$$\begin{aligned}
\frac{\partial x_2}{\partial u_1} > 0 & \quad \frac{\partial x_2}{\partial u_2} > 0 & \quad \frac{\partial^2 x_2}{\partial u_1^2} < 0 & \quad \frac{\partial^2 x_2}{\partial u_2^2} < 0 \\
\frac{\partial u_1}{\partial a_1} < 0 & \quad \frac{\partial u_1}{\partial a_2} > 0 & \quad \frac{\partial^2 u_1}{\partial a_2^2} < 0 & \\
\frac{\partial u_2}{\partial a_1} > 0 & \quad \frac{\partial u_2}{\partial a_2} < 0 & \quad \frac{\partial^2 u_2}{\partial a_2^2} < 0 & 
\end{aligned} \tag{S12}$$

The response coefficient  $\rho$  is given by:

$$\rho = - \left( \frac{\partial^2 x_2}{\partial a_1 \partial a_2} \bigg/ \frac{\partial^2 x_2}{\partial a_2^2} \right)_{\substack{a_1 = a_1^* \\ a_2 = a_2^*}} .$$

The necessary condition for  $x_2$  to be an ESS objective function is that  $\rho$  is positive, which means that there is positive feedback between the actions of the individuals. We will show that  $\rho$  is positive when,

$$\frac{\partial^2 x_2}{\partial u_1 \partial u_2} > 0 \tag{S13}$$

$$\frac{\partial^2 u_1}{\partial a_1 \partial a_2} \geq 0 \quad \frac{\partial^2 u_2}{\partial a_1 \partial a_2} \geq 0 . \tag{S14}$$

The inequality in condition (S13) says that the payoffs have to be complementary inputs into the objective  $x_2$ . This is exactly how we defined ‘‘conditional regard’’ in equation (3) for the other-regarding objective function given in equation (2). The two inequalities in condition (S14) say that the actions have to be complementary inputs into payoffs.

To show  $\rho > 0$ , we will first calculate  $\frac{\partial^2 x_2}{\partial a_1 \partial a_2}$  and show that its positive. If the objective  $x_2$  is a function of  $u_1$  and  $u_2$ , we can write using the chain rule:

$$\begin{aligned}
\frac{\partial^2 x_2}{\partial a_1 \partial a_2} &= \frac{\partial x_2}{\partial u_1} \frac{\partial^2 u_1}{\partial a_1 \partial a_2} + \frac{\partial x_2}{\partial u_2} \frac{\partial^2 u_2}{\partial a_1 \partial a_2} \\
&+ \frac{\partial u_1}{\partial a_1} \left( \frac{\partial^2 x_2}{\partial u_1^2} \frac{\partial u_1}{\partial a_2} + \frac{\partial^2 x_2}{\partial u_1 \partial u_2} \frac{\partial u_2}{\partial a_2} \right) \\
&+ \frac{\partial u_2}{\partial a_1} \left( \frac{\partial^2 x_2}{\partial u_1 \partial u_2} \frac{\partial u_1}{\partial a_2} + \frac{\partial^2 x_2}{\partial u_2^2} \frac{\partial u_2}{\partial a_2} \right) .
\end{aligned} \tag{S15}$$

Given our previous assumptions in (S12), the conditions (S13) and (S14) guarantee that  $\frac{\partial^2 x_2}{\partial a_1 \partial a_2} > 0$ .  
 2 Next, we calculate the denominator,  $\frac{\partial^2 x_2}{\partial a_2^2}$ , which must be negative for the behavioral equilibrium to be stable (see equation (S1)):

$$\begin{aligned} \frac{\partial^2 x_2}{\partial a_2^2} &= \frac{\partial x_2}{\partial u_1} \frac{\partial^2 u_1}{\partial a_2^2} + \frac{\partial x_2}{\partial u_2} \frac{\partial^2 u_2}{\partial a_2^2} \\ &+ \frac{\partial^2 x_2}{\partial u_1^2} \left( \frac{\partial u_1}{\partial a_2} \right)^2 + \frac{\partial^2 x_2}{\partial u_2^2} \left( \frac{\partial u_2}{\partial a_2} \right)^2 + 2 \frac{\partial^2 x_2}{\partial u_1 \partial u_2} \frac{\partial u_1}{\partial a_2} \frac{\partial u_2}{\partial a_2}. \end{aligned} \quad (\text{S16})$$

4 Our assumptions in (S12) and the condition (S13) guarantee that  $\frac{\partial^2 x_2}{\partial a_2^2} < 0$ .

We find that the additive payoff functions given in equation (1) and multiplicative objective  
 6 given in equation (2) meet both our assumptions in (S12) and our complementarity conditions in (S13) and (S14). Other simple objective functions do not necessarily generate the positive feedback  
 8 of actions between individuals necessary for mutual regard. For example, suppose the objective function of individual 2 is given by

$$x_2(a_1, a_2) = u_2(a_1, a_2) + \beta_2 u_1(a_1, a_1). \quad (\text{S17})$$

10 In this case,  $x_2$  is an other-regarding objective for positive  $\beta_2$ , which can still be thought of as a measure of the strength of that other-regard. However, using the same payoff functions defined in  
 12 equation (1), equation (S15) shows that  $\rho = 0$ . The first two terms of (S15) are zero since the mixed second derivatives of the payoff functions are zero, and the linearity of the objective function means  
 14 that the two terms in parentheses in (S15) are also zero. Thus, the additive objective function in (S17) generates no positive feedback and cannot support an evolutionarily stable level of mutual  
 16 regard  $\beta > 0$ .

#### S.4 Some results about Pareto efficiency at the behavioral equilibrium and ESS 18 outcome

First, we write the condition for an outcome to lie on the Pareto boundary, which is the set of  
 20 payoff pairs that are Pareto efficient, i.e. payoff pairs for which no player can increase its payoff without decreasing the payoff of another player. This means that for a fixed  $u_1$ ,  $u_2$  is maximized  
 22 on the Pareto boundary, and likewise  $u_1$  is maximized for a fixed  $u_2$ . If we set  $u_2(a_1, a_2) = \chi$  where

$\chi$  is a constant, the Implicit Function Theorem says that there exist some  $g(a_1, \chi) = a_2$  for which  
 2  $u_2(a_1, g_1(a_1, \chi)) = \chi$ . We maximize  $u_1$  at this value by differentiating

$$\frac{du_1(a_1, g(a_1, \chi))}{da_1} = \frac{\partial u_1}{\partial a_1} + \frac{\partial u_1}{\partial a_2} \frac{\partial g}{\partial a_1} = 0. \quad (\text{S18})$$

Now, we can get  $\frac{\partial g}{\partial a_1}$  by differentiating  $u_2$ , which by construction of the function  $g$ , must be constant:

$$\frac{du_2(a_1, g(a_1, \chi))}{da_1} = \frac{\partial u_2}{\partial a_1} + \frac{\partial u_2}{\partial a_2} \frac{\partial g}{\partial a_1} = 0. \quad (\text{S19})$$

4 Substituting  $\frac{\partial g}{\partial a_1}$  from (S19) into (S18) and rearranging gives:

$$\frac{\partial u_1}{\partial a_1} \frac{\partial u_2}{\partial a_2} = \frac{\partial u_1}{\partial a_2} \frac{\partial u_2}{\partial a_1} \quad (\text{S20})$$

### Pareto-efficiency implies concordance of objectives

6 First, we need to specify precisely what we mean by concordance of objectives. Remember that  
 $\frac{\partial x_1}{\partial a_1}$  measures how much and in which direction individual 1 changes its action. Now consider  
 8 the quantity  $\frac{\partial x_2}{\partial a_1}$ , which by the same interpretation, measures how much and in which direction  
 individual 2 *would* change  $a_1$ , if only it had control over it. Thus, the difference  $\frac{\partial x_1}{\partial a_1} - \frac{\partial x_2}{\partial a_1}$  can be  
 10 thought of as measuring how much individuals 1 and 2 differ in their preference over  $a_1$ . Similarly,  
 the difference  $\frac{\partial x_2}{\partial a_2} - \frac{\partial x_1}{\partial a_2}$  is the difference between individuals in preferences over  $a_2$ . If  $\frac{\partial x_1}{\partial a_1} - \frac{\partial x_2}{\partial a_1} =$   
 12  $\frac{\partial x_2}{\partial a_2} - \frac{\partial x_1}{\partial a_2} = 0$ , the two individuals do not differ in their preferences over which direction and how  
 much they should adjust their actions; their objectives are concordant. The concordance conditions  
 14 can hold locally at a single action pair, or globally over the entire action space. Because we focus  
 near the behavioral equilibrium, we will deal with local concordance of objectives.

16 Consider now the following class of objectives that are functions of  $u_1$  and  $u_2$ :  $x_1 = x_1(u_1, u_2)$ ,  
 $x_2 = x_2(u_1, u_2)$ . The first-order conditions for the behavioral equilibrium is:

$$\frac{\partial x_1}{\partial a_1} = \frac{\partial x_1}{\partial u_1} \frac{\partial u_1}{\partial a_1} + \frac{\partial x_1}{\partial u_2} \frac{\partial u_2}{\partial a_1} = 0 \quad (\text{S21})$$

$$\frac{\partial x_2}{\partial a_2} = \frac{\partial x_2}{\partial u_1} \frac{\partial u_1}{\partial a_2} + \frac{\partial x_2}{\partial u_2} \frac{\partial u_2}{\partial a_2} = 0 \quad (\text{S22})$$

Now, from (S20), we can substitute  $\frac{\partial u_1}{\partial a_1} = \frac{\partial u_1}{\partial a_2} \frac{\partial u_2}{\partial a_1} / \frac{\partial u_2}{\partial a_2}$  into (S21), and get:

$$\frac{\partial x_1}{\partial u_1} \frac{\partial u_1}{\partial a_2} \frac{\partial u_2}{\partial a_1} + \frac{\partial x_1}{\partial u_2} \frac{\partial u_2}{\partial a_1} \frac{\partial u_2}{\partial a_2} = 0 \quad (\text{S23})$$

2 Canceling  $\frac{\partial u_2}{\partial a_1}$ , we end up with:

$$\frac{\partial x_1}{\partial u_1} \frac{\partial u_1}{\partial a_2} + \frac{\partial x_1}{\partial u_2} \frac{\partial u_2}{\partial a_2} = \frac{\partial x_1}{\partial a_2} = 0 \quad (\text{S24})$$

Thus, at a Pareto optimal behavioral equilibrium, individual 1's objective is (locally) concordant  
 4 with respect to individual 2's action  $a_2$ . Note that this also means that individual 1's objective  
 function  $x_1$  is a local peak (subject to second order conditions) at this behavioral equilibrium. One  
 6 can show using the same argument that it must be  $\frac{\partial x_2}{\partial a_2} = \frac{\partial x_2}{\partial a_1} = 0$ , such that the individuals'  
 objectives are concordant over  $a_1$  as well at the Pareto optimal equilibrium.

### 8 **Conditions for a Pareto-efficient ESS outcome and objectives**

Now, we focus our attention specifically to the Pareto-efficient behavioral equilibrium of two indi-  
 10 vidual that have an evolutionarily stable objective function. The game is symmetric ( $u_1(a_1, a_2) =$   
 $u_2(a_2, a_1)$ ). We further assume that the individuals' objective functions are functions of their pay-  
 12 offs:  $x = x(u_1, u_2)$ . Even though both individuals have the same objectives, we concentrate on  
 individual 2 with its objective  $x_2$  for consistency; the analysis is equally valid for  $x_1$ . Because the  
 14 game is symmetric, the behavioral equilibrium in a monomorphic ESS also has to be symmetric,  
 i.e.  $a_1^* = a_2^* = a^*$ . We have three equations that this outcome has to satisfy. First, the Pareto  
 16 efficiency in a symmetric outcome implies that it maximizes  $u_2(a, a) = u_1(a, a)$ :

$$\frac{du_2(a, a)}{da} = \left[ \frac{\partial u_2}{\partial a_1} + \frac{\partial u_2}{\partial a_2} \right]_{a_1=a_2=a^*} = \left[ \frac{\partial u_1}{\partial a_1} + \frac{\partial u_1}{\partial a_2} \right]_{a_1=a_2=a^*} = 0 \quad (\text{S25})$$

We denote the value of  $a$  satisfying equation (S25) by  $\hat{a}$ ; i.e.,  $a^* = \hat{a}$ . The Pareto-efficient action  $\hat{a}$   
 18 must also satisfy the behavioral equilibrium conditions, which for individual 2 reads:

$$\left[ \frac{\partial x_2}{\partial a_2} \right]_{a_1=a_2=\hat{a}} = \left[ \frac{\partial x_2}{\partial u_1} \frac{\partial u_1}{\partial a_2} + \frac{\partial x_2}{\partial u_2} \frac{\partial u_2}{\partial a_2} \right]_{a_1=a_2=\hat{a}} = 0 \quad (\text{S26})$$



Finally, we have the ESS condition:

$$\left[ \frac{\partial u_1}{\partial a_1} - \left( \frac{\partial^2 x_2}{\partial a_1 \partial a_2} / \frac{\partial^2 x_2}{\partial a_2^2} \right) \frac{\partial u_1}{\partial a_2} \right]_{a_1=a_2=\hat{a}} = 0 \quad (\text{S27})$$

2 The Pareto efficiency condition (S25) and the symmetry of the payoff functions yield the following relations at the Pareto optimal outcome:

$$\frac{\partial u_1}{\partial a_1} = -\frac{\partial u_1}{\partial a_2} = -\frac{\partial u_2}{\partial a_1} = \frac{\partial u_2}{\partial a_2} \quad (\text{S28})$$

4 With these relations, we can immediately see that the response coefficient  $\rho = -\frac{\partial u_1}{\partial a_1} / \frac{\partial u_1}{\partial a_2} = 1$ . This is a slight generalization of the result from André and Day [7], who showed that the response  
6 coefficient at the payoff-maximizing equilibrium is equal to 1 for the continuous iterated Prisoner's Dilemma game. With  $-\frac{\partial u_1}{\partial a_1} / \frac{\partial u_1}{\partial a_2} = 1$ , the ESS condition can be re-arranged and expanded using  
8 the chain rule:

$$\begin{aligned} & - \left[ \frac{\partial^2 x_2}{\partial u_1^2} \left( \frac{\partial u_1}{\partial a_2} \right)^2 + \frac{\partial^2 x_2}{\partial u_1 \partial u_2} \frac{\partial u_1}{\partial a_2} \frac{\partial u_2}{\partial a_2} + \frac{\partial x_2}{\partial u_1} \frac{\partial^2 u_1}{\partial a_2^2} \right. \\ & \quad \left. + \frac{\partial^2 x_2}{\partial u_2^2} \left( \frac{\partial u_2}{\partial a_2} \right)^2 + \frac{\partial^2 x_2}{\partial u_1 \partial u_2} \frac{\partial u_1}{\partial a_2} \frac{\partial u_2}{\partial a_2} + \frac{\partial x_2}{\partial u_2} \frac{\partial^2 u_2}{\partial a_2^2} \right]_{a_1=a_2=\hat{a}} \\ & = \left[ \frac{\partial^2 x_2}{\partial u_1^2} \frac{\partial u_1}{\partial a_1} \frac{\partial u_1}{\partial a_2} + \frac{\partial^2 x_2}{\partial u_1 \partial u_2} \frac{\partial u_1}{\partial a_2} \frac{\partial u_2}{\partial a_1} + \frac{\partial x_2}{\partial u_1} \frac{\partial^2 u_1}{\partial a_1 \partial a_2} \right. \\ & \quad \left. + \frac{\partial^2 x_2}{\partial u_2^2} \frac{\partial u_2}{\partial a_1} \frac{\partial u_2}{\partial a_2} + \frac{\partial^2 x_2}{\partial u_1 \partial u_2} \frac{\partial u_1}{\partial a_1} \frac{\partial u_2}{\partial a_2} + \frac{\partial x_2}{\partial u_2} \frac{\partial^2 u_2}{\partial a_1 \partial a_2} \right]_{a_1=a_2=\hat{a}} \quad (\text{S29}) \end{aligned}$$

Using the relations in (S28), we can cancel the terms involving the second derivatives of  $x_2$  with  
10 respect to  $u_1$  and  $u_2$ . We can also see using these relations that (S26) reduces to:  $\frac{\partial x_2}{\partial u_1} = \frac{\partial x_2}{\partial u_2}$ . Thus, equation (S29) can be re-written as:

$$- \left[ \frac{\partial x_2}{\partial u_1} \left( \frac{\partial^2 u_1}{\partial a_1 \partial a_2} + \frac{\partial^2 u_2}{\partial a_1 \partial a_2} \right) \right]_{a_1=a_2=\hat{a}} = \left[ \frac{\partial x_2}{\partial u_1} \left( \frac{\partial^2 u_1}{\partial a_2^2} + \frac{\partial^2 u_2}{\partial a_2^2} \right) \right]_{a_1=a_2=\hat{a}}, \quad (\text{S30})$$

12 or, equivalently

$$\left[ \frac{\partial x_2}{\partial u_1} \left( \frac{\partial^2 u_1}{\partial a_1 \partial a_2} + \frac{\partial^2 u_1}{\partial a_2^2} + \frac{\partial^2 u_2}{\partial a_1 \partial a_2} + \frac{\partial^2 u_2}{\partial a_2^2} \right) \right]_{a_1=a_2=\hat{a}} = 0. \quad (\text{S31})$$

This equation can only be satisfied if the terms in the parentheses add up to 0, or if  $\frac{\partial x_2}{\partial u_1} = 0$ .  
2 Since the payoff function in a game is exogenously specified, the former case is non-generic and  
not likely to hold. Thus, we conclude that at an Pareto-efficient behavioral equilibrium whose  
4 objective functions are evolutionarily stable, the objective function must have a critical point in  
the  $u_1$  direction. By repeating the same argument, but substituting  $\frac{\partial x_2}{\partial u_1}$  instead of  $\frac{\partial x_2}{\partial u_2}$ , we can  
6 conclude that  $x_2$  must also have a critical point in the  $u_2$  direction at  $(\hat{a}, \hat{a})$ . With the further  
assumptions that  $\frac{\partial^2 x_2}{\partial u_1^2} < 0$  and  $\frac{\partial^2 x_2}{\partial u_2^2} < 0$  from section S.3, we can conclude that the objective  
8 function  $x_2$  has to have a local peak at the Pareto efficient behavioral equilibrium, if it is to be an  
ESS.

## 10 References

- [1] Edelman-Keshet L (2005) *Mathematical Models in Biology* (Society for Industrial and Applied  
12 Mathematics, Philadelphia, PA).
- [2] Rosen JB (1965) Existence and uniqueness of equilibrium points for concave N-person games.  
14 *Econometrica* 33:520–534.
- [3] Marcus M, Minc H (1992) *A Survey of Matrix Theory and Matrix Inequalities* (Dover, New  
16 York, NY).
- [4] Eshel I, Motro U (1981) Kin selection and strong evolutionary stability of mutual help. *Theor*  
18 *Popul Biol* 19:420–433.
- [5] Taylor PD (1989) Evolutionary stability in one-parameter models under weak selection. *Theor*  
20 *Popul Biol* 36:125–143.
- [6] Christiansen FB (1991) On conditions for evolutionary stability for a continuously varying  
22 character. *Am Nat* 138:37–50.
- [7] André JB, Day T (2007) Perfect reciprocity is the only evolutionarily stable strategy in the  
24 continuous iterated prisoner’s dilemma. *J Theor Biol* 247:11–22.

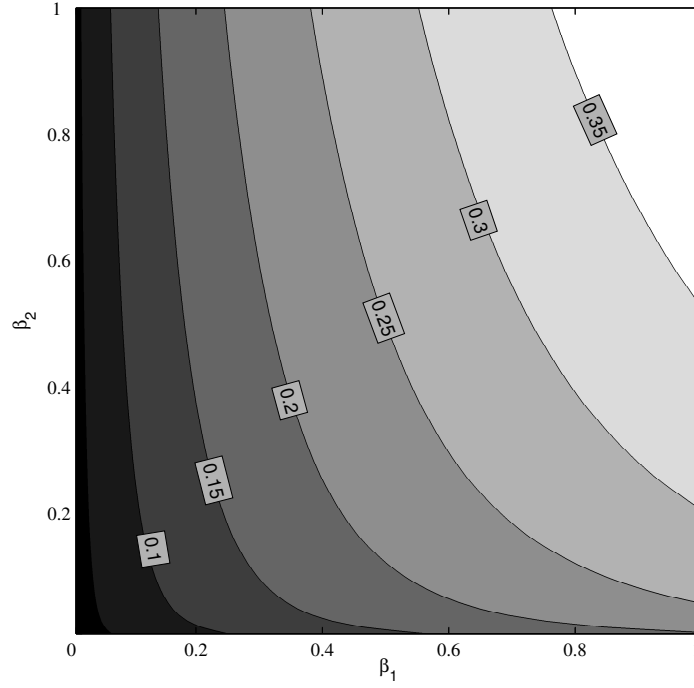

Figure S1: Contour plot of the action of individual 1 at the behavioral equilibrium,  $a_1^*$ , which is obtained by plugging the payoff functions in (1) and the objective functions in (2) into the equations in (5) and solving numerically for  $a_1^*$  and  $a_2^*$ . The value of  $a_1^*$  is given by the contour labels. Since the payoff and objective functions are symmetric, the plot of  $a_2^*$  can be obtained by simply rotating this plot about the  $\beta_1 = \beta_2$  line. Using the resource sharing example,  $a_1^*$  can be thought of as the donation level of individual at the behavioral equilibrium. This level is an increasing function of both  $\beta_1$ , the level of other-regard the focal individual 1 has for its partner, and  $\beta_2$ , the level of other-regard the partner has for the focal individual.  $\frac{\partial a_1^*}{\partial \beta_1}$  is generally larger than  $\frac{\partial a_1^*}{\partial \beta_2}$ , as one might expect given that the two individuals do not perfectly mirror each other's actions, though this difference decreases as both  $\beta_1$  and  $\beta_2$  increase.
